# Supplementary material for: Histone H3K9 Demethylase JMJD2B Plays a Role in LXRα-Dependent Lipogenesis
Source: PubMed Central journal article supplement (PMC7664202; doi:10.3390/ijms21218313), 2020-11-05
Supplement: ijms-21-08313-s001.pdf [file ijms-21-08313-s001.pdf]

(A)

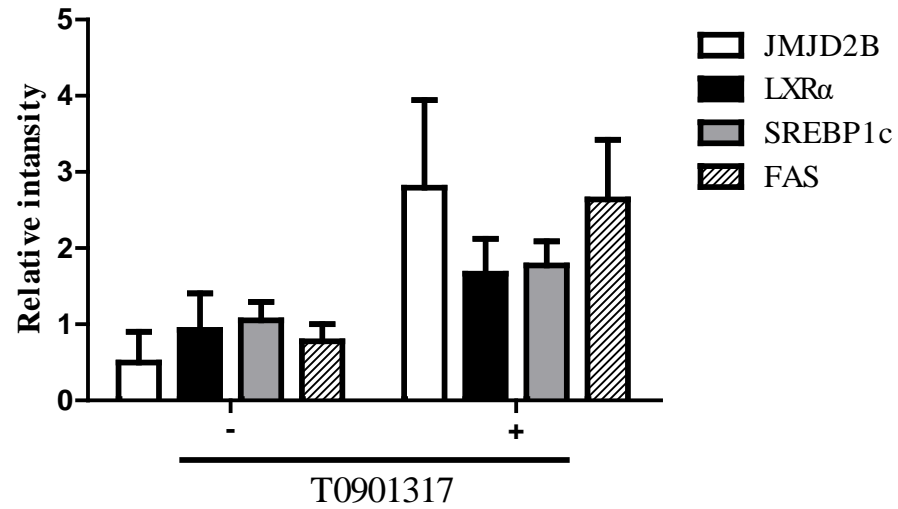

(B)

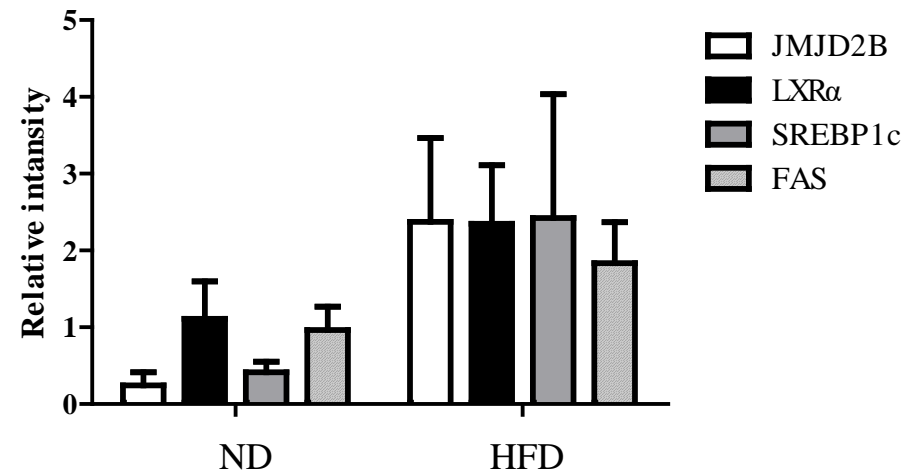

Supplementary Fig. S1. The bar graph of band density in figure 1I (A) and 2I (B)

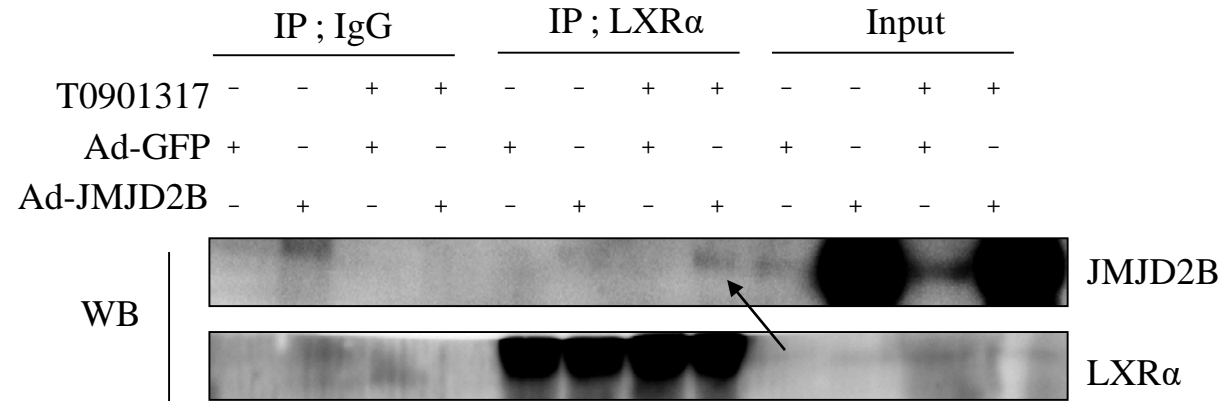

Supplementary Fig. S2. HepG2 cells were infected with Ad-GFP or Ad-JMJD2B and then incubated in the presence or absence of T09013178 for 24 h. Protein extracts were immunoprecipitated with LXR $\alpha$  antibody-agarose beads, and the interaction was detected with immunoblot analysis using JMJD2B antibody. Arrow indicates JMJD2B band detected in LXR $\alpha$  antibody-mediated immunoprecipitants.

Supplementary Table S1. Primer sequences used for real-time PCR

| Species | Gene         | Sequence (5' → 3')                                               |
|---------|--------------|------------------------------------------------------------------|
| Human   | JMJD2B       | F: GGCCGGAGCTGCACACT<br>R: CGCGTCTTTGCACAGAGTAAGA                |
|         | LXR $\alpha$ | F: GTCCTTTTCTGACCGGCTT<br>R: TGAATTCCACTTGCAGCCCT                |
|         | SREBP1c      | F: CGG AGCCATGGATTGCACT<br>R: TAGGCCAGGGAAGTCACTG                |
|         | FAS          | F: TCGTGGGCTACAGCATGGT<br>R: GCCCTCTGAAGTCGAAGAAGAA              |
|         | ACC          | F: CTGTAGAAACCCGGACAGTAGAAC<br>R : GGTCAGCATAACATCTCCATGTG       |
|         | SCD1         | F: CACCACATTCTTCATTGATTGCA<br>R: ATGGCGGCCTTGGAGACT              |
|         | 18S          | F: CGGCTACCACATCCAAGGAA<br>R: GCTGGAATTACCGCGGCT                 |
| Mouse   | JMJD2B       | F: GGCCAAGATCATTCCACCCA<br>R: CCCACAGTCATGGCCTTCTT               |
|         | LXR $\alpha$ | F: ATCGCCTTGCTGAAGACCTCTG<br>R: GATGGGGTTGATGAACTCCACC           |
|         | SREBP1c      | F: TGGATTGCACATTTGAAGACAT<br>R: GCCAGAGAAGCAGAAGAG               |
|         | FAS          | F: AGG TGG TGA TAG CCG GTA TGT<br>R: TGG GTA ATC CAT AGA GCC CAG |
|         | ACC          | F: TGACAGACTGATCGCAGAGAAAG<br>R: TGGAGAGCCCCACACACA              |
|         | SCD1         | F: CCGGAGACCCCTTAGATCGA<br>R: TAGCCTGTAAAAGATTTCTGCAAACC         |
|         | 18S          | F: CGGCTACCACATCCAAGGAA<br>R: CGGCTACCACATCCAAGGAA               |
